# Supplementary material
Source: JCI journal article supplement (doi:10.1172/jci.insight.201000)
Supplement: sd1 [file 1]

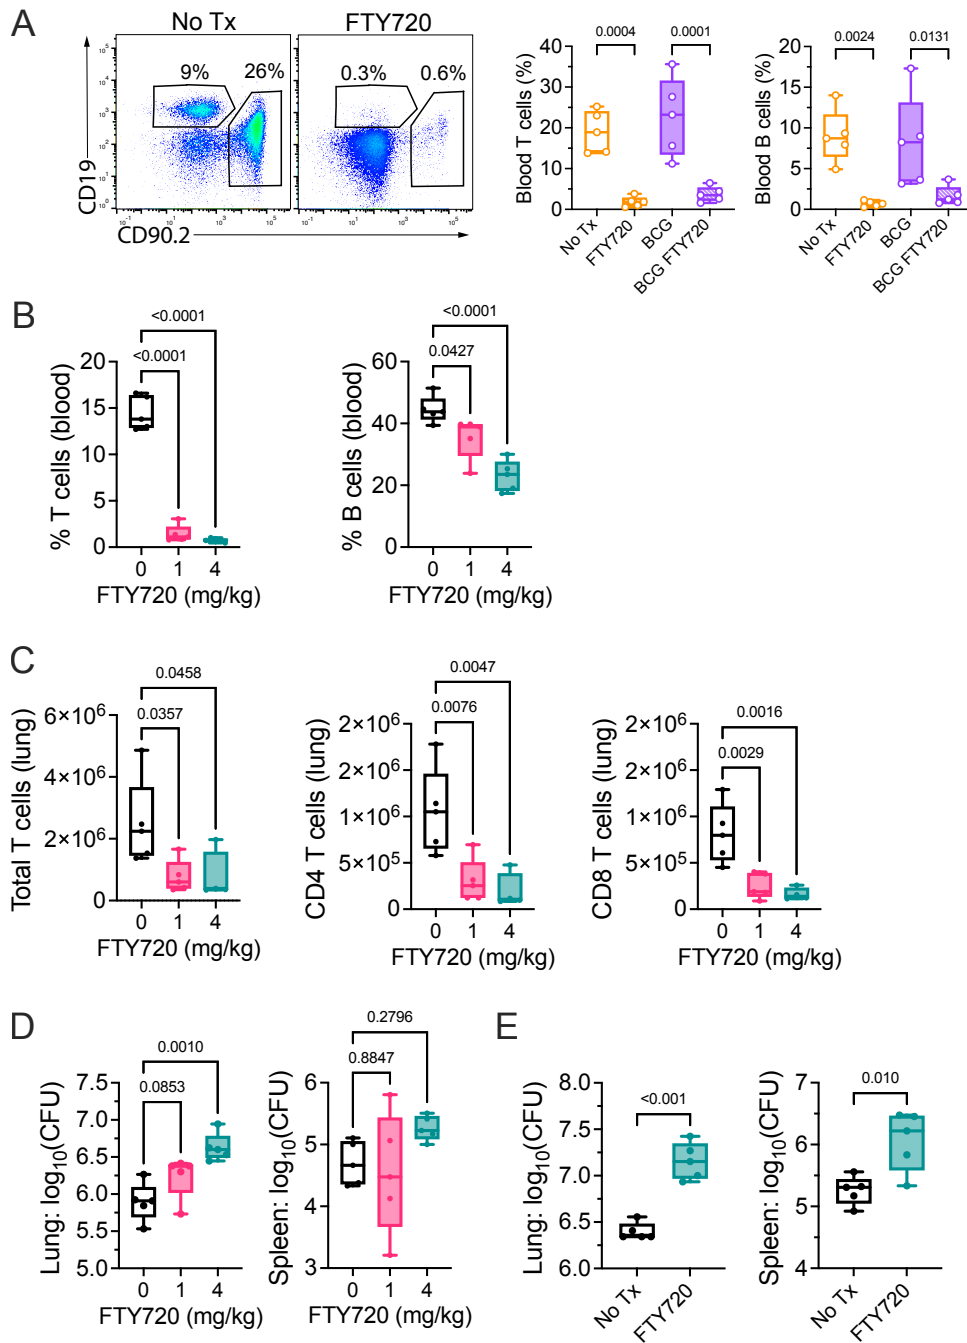

Figure S1

4 **Figure S1. Optimization of FTY720 use in the murine TB model (pertains to Fig.3)**

- 5 A. Treatment of B6 mice with FTY720 after Mtb infection led to a reduction in the percentage of  
6 T cells (left) and B cells (right) among all live cells in peripheral blood as determined by flow  
7 cytometry.
- 8 B. Treatment with FTY720 led to significant reductions in the frequency of both T (left) and B  
9 (right) cells in the blood of B6 mice after Mtb infection.
- 10 C. Treatment with FTY720 led to significant reductions in the number of total T cells (left) including  
11 CD4 (middle) and CD8 (right) T cells in the lungs of Mtb infected B6 mice.
- 12 D. The bacterial burden in the lungs (left) or spleens (right) of infected B6 mice was increased  
13 when treated with 4 mg/kg of FTY720, but not 1 mg/kg of FTY720, as determined four wpi.  
14 FTY720 did not have a significant effect on Mtb control in the spleens of treated mice. One-way  
15 ANOVA with Dunnett's multiple comparisons test.
- 16 E. CFU in the lung (left) and spleen (right) of B6 mice at four wpi. This experiment performed in  
17 parallel with the one with CC042 mice depicted in Figure 3.
- 18 n=4-5 mice/group. One-way ANOVA with Dunnett's multiple comparisons test (A-D) or t-test (E).  
19 Data is representative of one (A-D) or two (E) individual experiments. Box plots indicate median  
20 (middle line), 25th, 75th percentile (box) and minimum and maximum (whiskers).

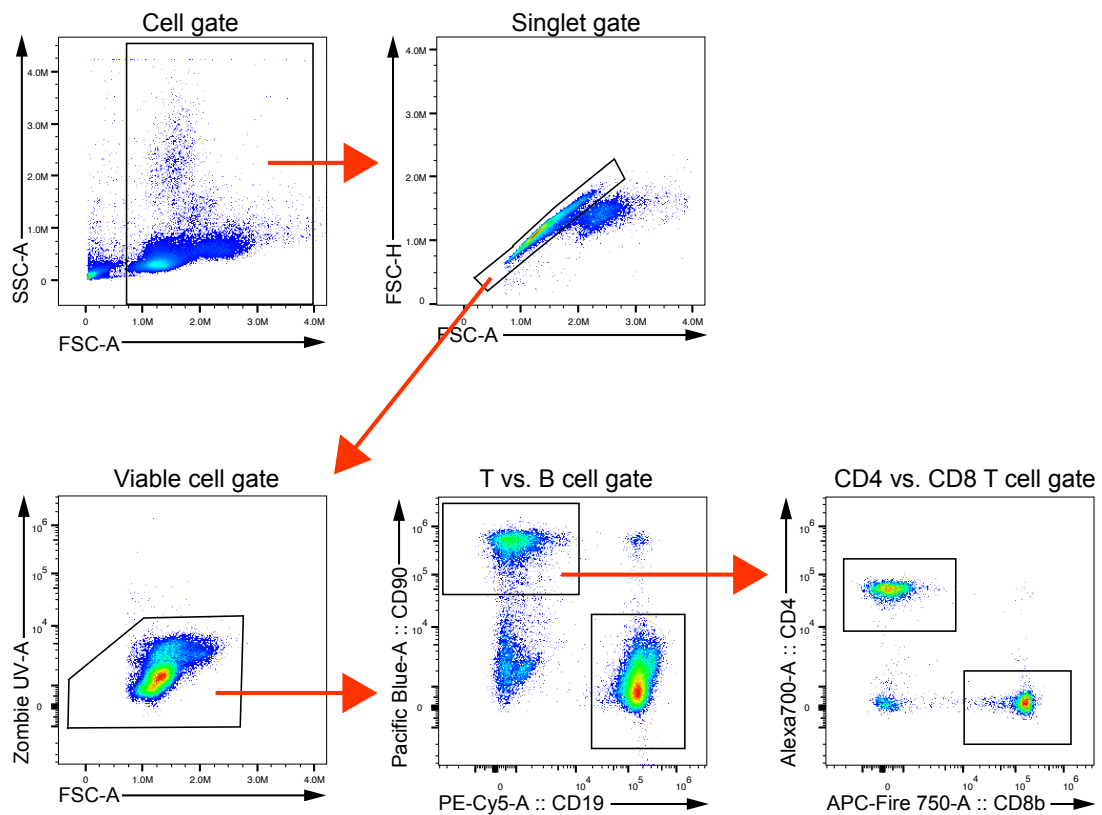

21

22 **Figure S2. Gating Scheme for Identifying B & T cells in Peripheral Blood**

23 Gating strategy for identifying B and T cells in the peripheral blood. In brief, doublets were  
 24 excluded and then a viability dye was used to exclude dead cells. B cells were identified by  
 25 expression of CD19 while T cells were identified by expression of CD90 or CD3. Then, CD4 and  
 26 CD8 $\alpha$  or CD8 $\beta$  was used to specifically identify CD4 T and CD8 T Cells.

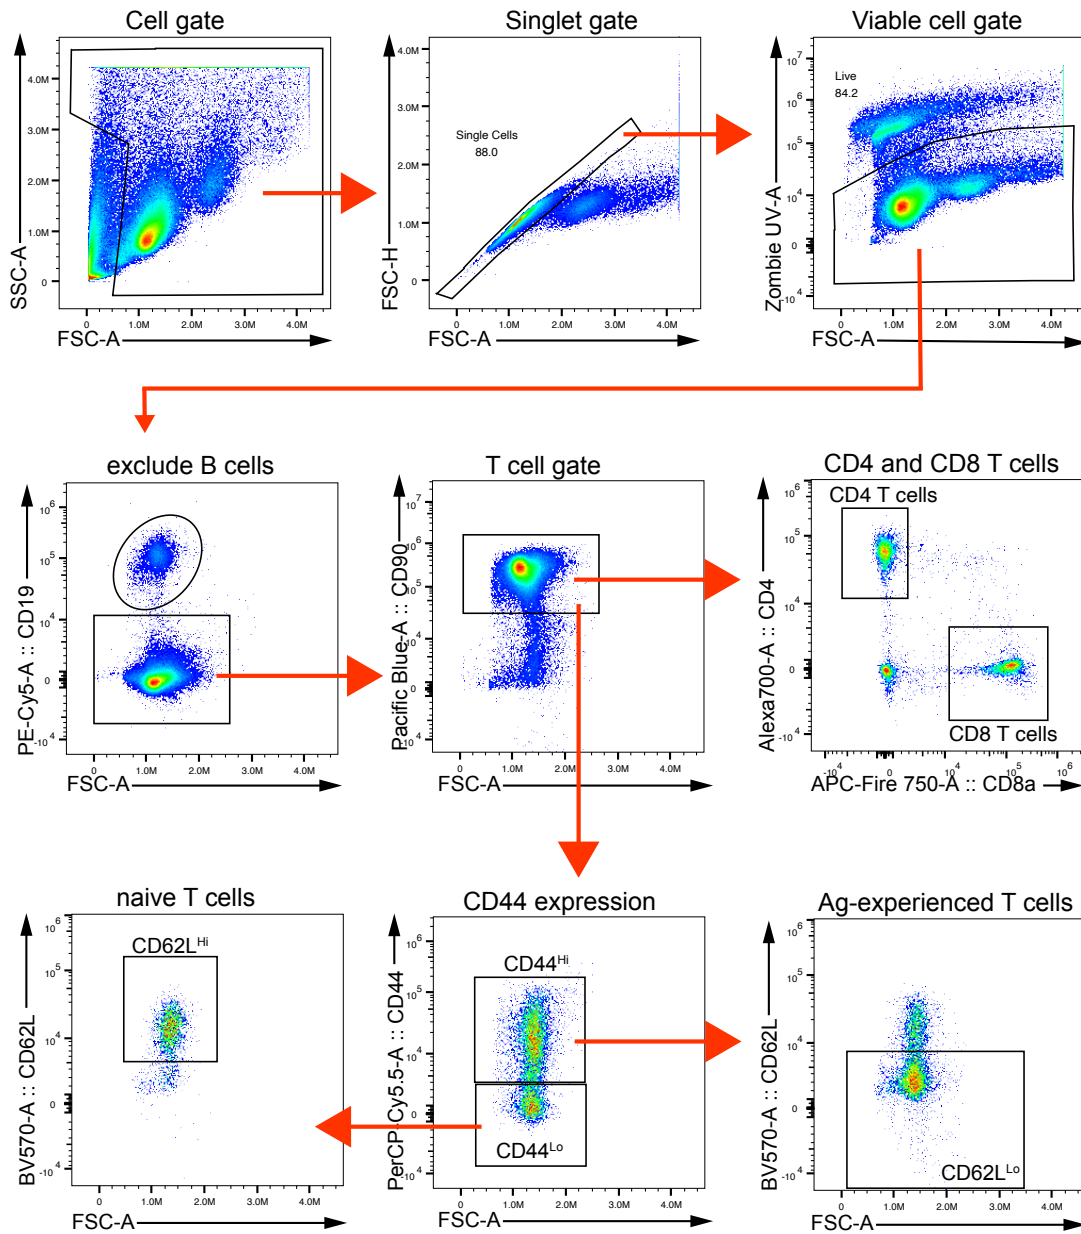

27

28 **Figure S3. Gating Scheme for Identifying T cells in Lung**

29 Gating strategy for identifying T cell population in the lung. In brief, doublets were excluded and  
 30 then a viability dye was used to exclude dead cells. B cells were then excluded by expression of  
 31 CD19, while T cells were identified by expression<sup>hi</sup> of CD90. T cells were then subclassified by  
 32 CD4 or CD8 by their expression of CD4 or CD8 $\alpha$  or CD8 $\beta$ , respectively. Naïve T cells were  
 33 identified by the expression of CD62L and lack of CD44 expression. Antigen-experienced T cells  
 34 were identified by expression of CD44 and lack of expression of CD62L.

| A | Specificity | Primary antibody<br>(in vivo depleting) | Secondary antibody<br>(in vitro staining) | Cross-blocking? |
|---|-------------|-----------------------------------------|-------------------------------------------|-----------------|
|   | CD4         | GK1.5                                   | GK1.5<br>RM4-4<br>RM4-5                   | yes<br>no<br>no |
|   | CD8a        | 2.4.3                                   | 53-6.7<br>YTS156.7.7                      | no<br>no        |
|   | CD20        | MB20-11                                 | 6D5                                       | no              |

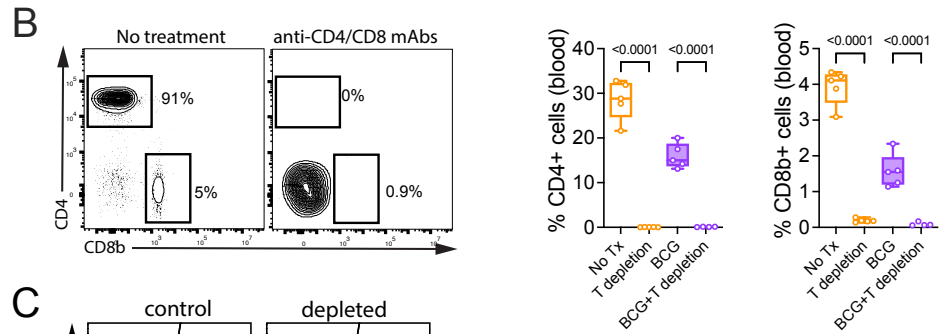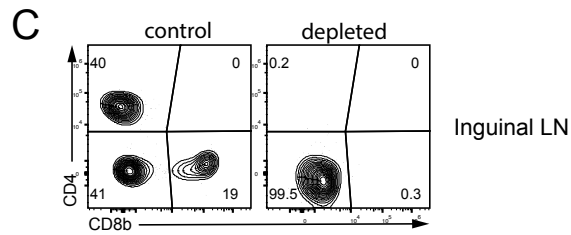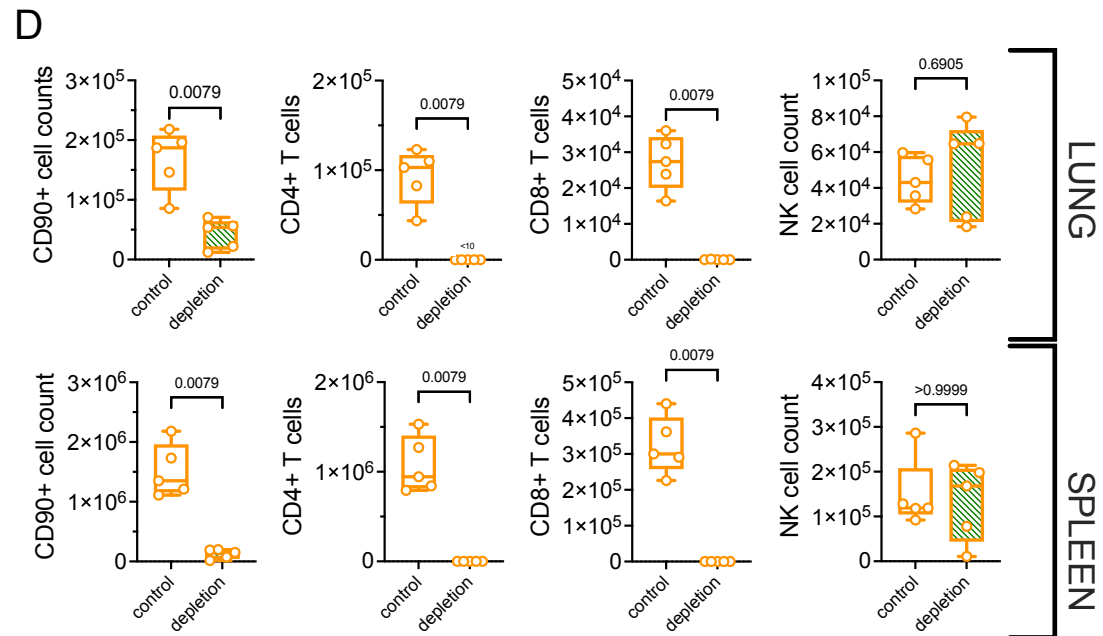

Figure S4

37 **Figure S4. T cell depletion strategies (pertains to Fig.4)**

38 A. Evaluation of antibody cross-blocking potential in CC042 mice. The anti-CD4 mAb GK1.5 that  
39 is used to deplete CD4 T cells in vivo blocked the binding of labeled GK1.5, but not of alternate  
40 anti-CD4 mAbs RM4-4 or RM4-5. The anti-CD8 $\alpha$  mAb used in vivo (clone 2.4.3) does not block  
41 binding of alternate anti-CD8 $\alpha$  clone 53-6.7 or anti-CD8 $\beta$  clone YTS156.7.7. Therefore, the  
42 efficiency of CD4 and CD8 T cell depletion in vivo by GK1.5 and 2.4.3 was quantified using anti-  
43 CD4 mAbs RM4-4 or RM4-5 and anti-CD8 $\alpha$  mAb 53-6.7 or CD8 $\beta$  YTS156.7.7 in all T cell  
44 depletion experiments. Similarly, the anti-CD20 mAb MB20-11, used to deplete B cell in vivo, did  
45 not inhibit the binding of anti-CD19 mAb clone 6D5 to B cells.

46 B. Representative flow plot of CD4 and CD8 $\beta$  expression of CD90<sup>+</sup> T cells in the blood at four wpi  
47 of a representative untreated CC042 mouse and one treated with anti-CD4 and anti-CD8 $\alpha$  mAbs  
48 (left). Frequency of CD90<sup>+</sup> CD4 and CD8 $\beta$  T cells in blood at the end of the depletion period  
49 before Mtb infection of CC042 mice (Right).

50 C. Representative flow plot demonstrating CD4 and CD8 T cell depletion in the inguinal LN from  
51 BCG-vaccinated CC042 mice after treatment with anti-CD4 and anti-CD8 mAbs as described in  
52 the *Methods*.

53 D. Depletion of CD4 and CD8 T cells from the lungs (top) and spleens (bottom) of CC042 mice.  
54 CC042 mice were vaccinated with BCG and treated with anti-CD4 and anti-CD8 mAbs as  
55 described in the *Methods*. Cells were stained with markers for CD4 and CD8 T cells, and NK  
56 (NKp46) cells.

57 One-way ANOVA with Šídák's multiple comparisons test (B) Or Mann-Whitney t-test (D). Data  
58 are representative of two (D) or three (B, C) independent experiments with similar results. Each  
59 point represents an individual subject, n=5 mice per group. Box plots indicate median (middle  
60 line), 25th, 75th percentile (box) and minimum and maximum (whiskers).

61

62

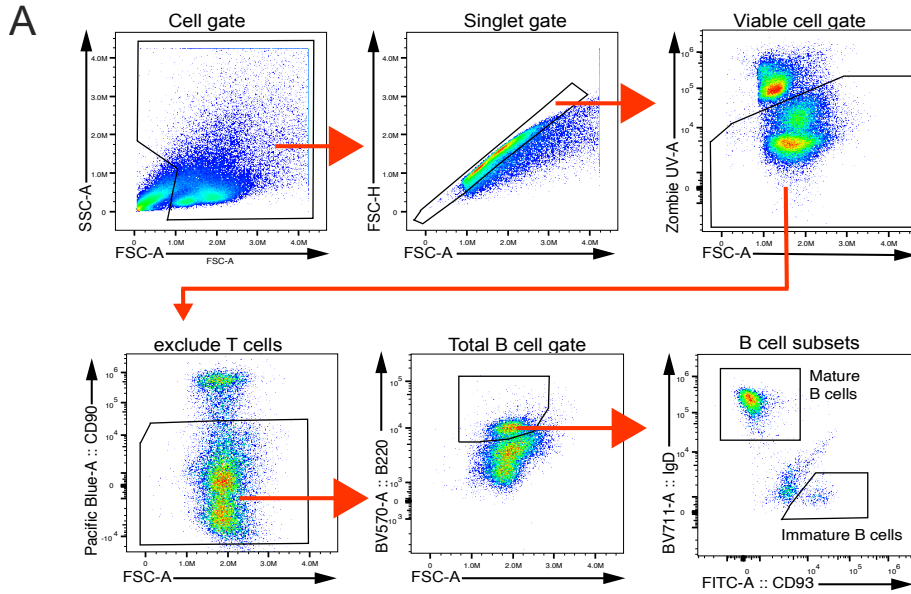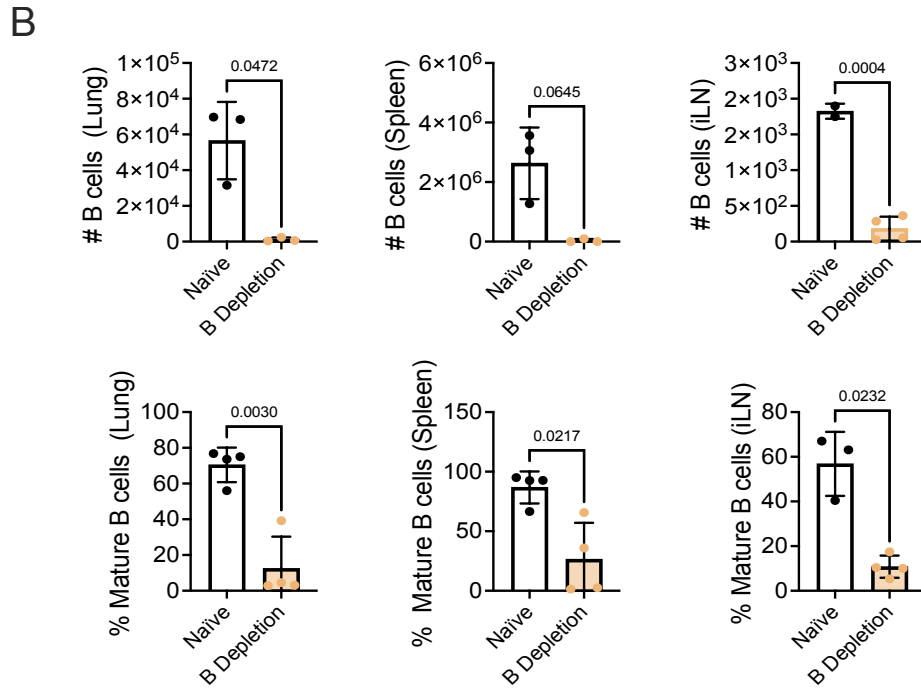

Figure S5

65 **Figure S5. B cell depletion strategies (pertains to Fig.5)**

66 A. Gating strategy for identifying B cell populations in the lung, lymph node and spleen. In brief,  
67 doublets were excluded and then a viability dye was used to exclude dead cells. T cells were  
68 excluded by the expression of CD90. Total B cells were identified by the expression of B220. B  
69 cells were then further classified as mature or immature. Mature B cells were identified by  
70 expression of IgD and lack of CD93 expression, while immature B cells were identified by  
71 expression of CD93 and lack of IgD expression.

72 B. Number of total B cells (top row) and frequency of mature ( $B220^{+}IgD^{+}CD93^{-}$ ) B cells as a  
73 percentage of total B cells (bottom row) in the lung (left), spleen (middle) and iLN (right), two  
74 weeks after a single administration of anti-CD20 mAb to naïve CC042 mice. Data represents two  
75 experiments. Each point is an individual subject, n=3-4 mice per group. Unpaired t-test. Bars,  
76 mean. Line, SD.

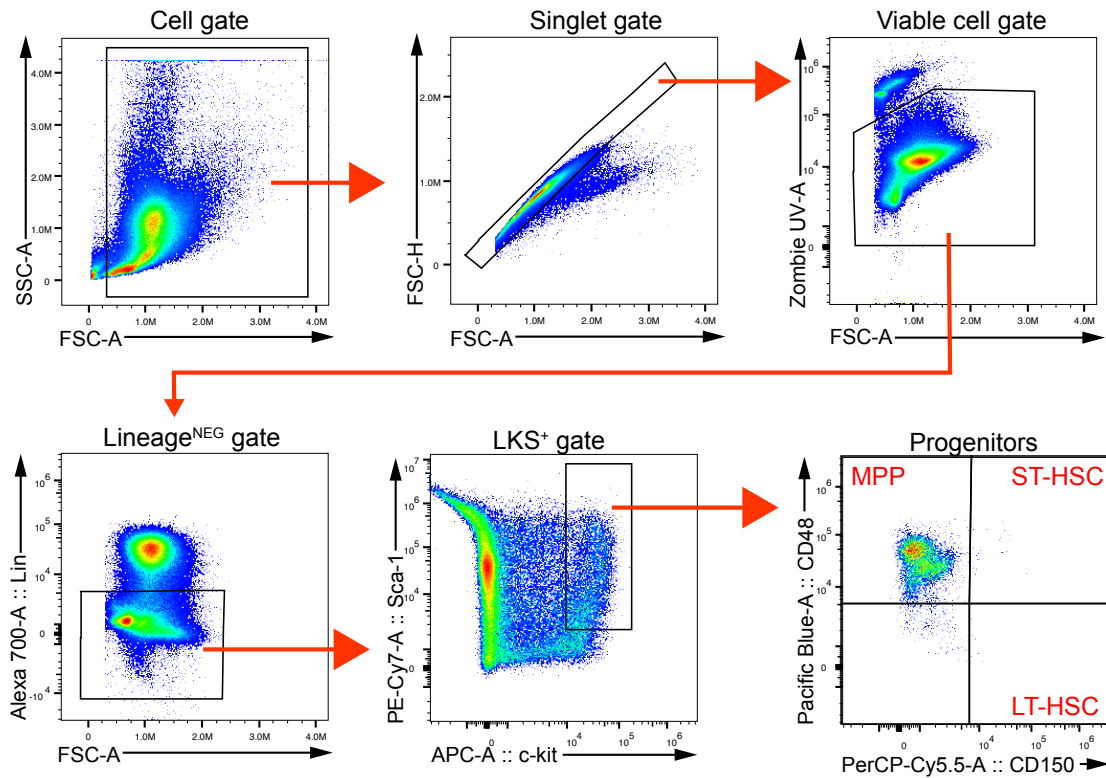

77

78 **Figure S6. Gating Scheme for Identifying LKS<sup>+</sup> Cells in Bone Marrow**

79 Gating strategy for identifying LKS<sup>+</sup> hematopoietic stem cells in the bone marrow. Doublets were  
 80 excluded and then a viability dye was used to exclude dead cells. LKS<sup>+</sup> cells were then identified  
 81 by the lack of expression of a lineage marker and co-expression of Sca-1 and c-kit. LKS<sup>+</sup> cells  
 82 were then further sub-divided into MPP, ST-HSC and LT-HSC by differential expression of CD48  
 83 and CD150.

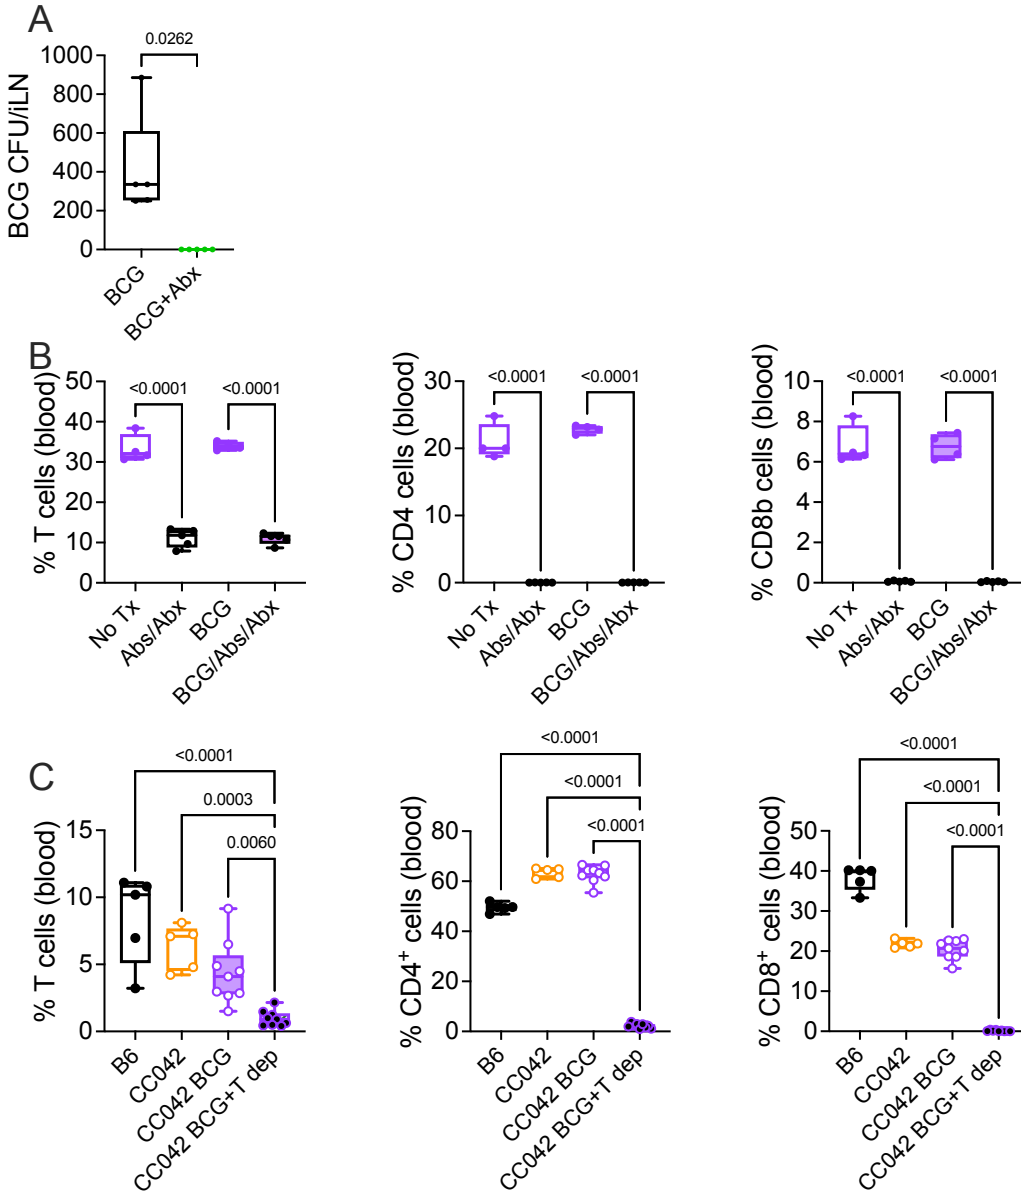

Figure S7

86 **Figure S7. Efficacy of antibiotic treatment and combined T cell depletion strategy (pertains**  
87 **to Fig.7)**

88 A. BCG in LNs is cleared by antibiotics. One of two independent experiments. Each dot represents  
89 an individual mouse, n=5 mice per group. Paired t-test. The limit of detection = 5 CFU.

90 B. Frequency of total CD90<sup>+</sup> T cells (right), CD4 (middle) or CD8 (left) T cells in peripheral blood  
91 as a percentage of total live cells. Groups are untreated CC042 mice (No Tx), unvaccinated  
92 CC042 mice treated with anti-CD4 + anti-CD8 $\alpha$  mAbs and antibiotics (Abs/Abx), BCG-vaccinated  
93 CC042 mice (BCG) or BCG-vaccinated CC042 mice treated with anti-CD4 + anti-CD8 $\alpha$  mAbs  
94 and antibiotics (BCG/Abs/Abx).

95 C. Frequency of total CD90<sup>+</sup> T cells (right), CD4 (middle) or CD8 (left) T cells in peripheral blood  
96 as a percentage of total live cells. Groups are unvaccinated B6 mice (B6), unvaccinated CC042  
97 mice (CC042), BCG-vaccinated CC042 mice (BCG) or BCG-vaccinated CC042 mice treated with  
98 anti-CD4 + anti-CD8 $\alpha$  mAbs (CC042 BCG+T Dep).

99 B, C. Data is representative of 2 experiments with similar results. Each point is an individual  
100 subject, n=4-9. Bars, mean. One-way ANOVA with Šídák's multiple comparisons test. Box plots  
101 indicate median (middle line), 25th, 75th percentile (box) and minimum and maximum (whiskers).

**A**

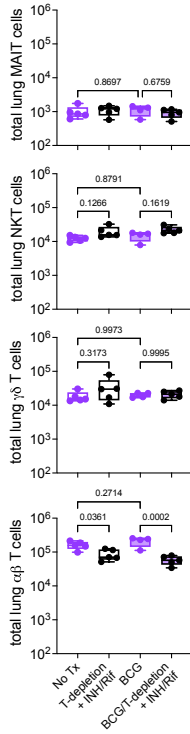

**B**

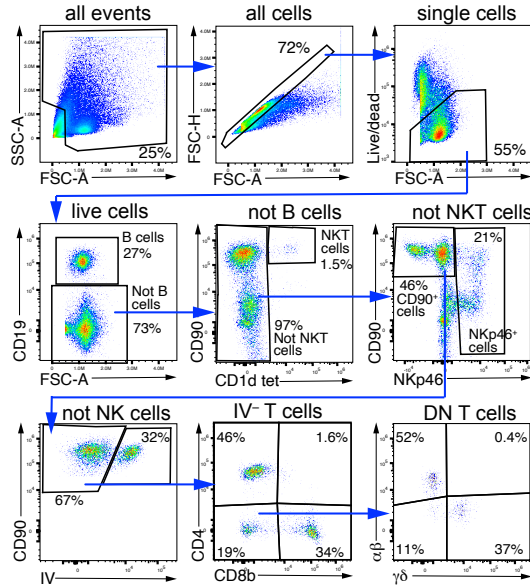

**C**

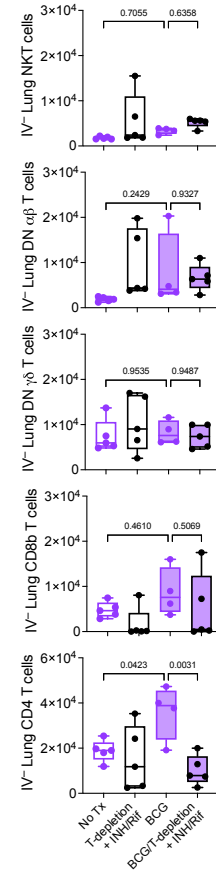

102

103

104 **Figure S8. T cells in the lung parenchyma after Mtb infection (pertains to Fig.7)**

105 A. Different types of T cells were enumerated in the lungs of mice treated as shown in Fig.7D-E,  
106 4 weeks after Mtb challenge. MAIT and NKT cells identified using tetramers.

107 B. Gating strategy to measure different T cell classes and their location in the lung. Intravascular  
108 cells were identified by injecting fluorochrome labelled antibodies intravenously, 3 minutes prior  
109 to euthanasia.

110 C. Number of lung parenchyma (i.e., IV<sup>-</sup>) T cell subsets in unvaccinated and BCG vaccinated  
111 CC042 mice after treatment (see Fig.7D), measured four weeks after Mtb infection.

112 Representative result from one of two independent experiments using untreated CC042 mice (No  
113 Tx), unvaccinated CC042 mice treated with anti-CD4 + anti-CD8 $\alpha$  mAbs and antibiotics (T-  
114 depletion + INH/Rif), BCG-vaccinated CC042 mice (BCG) or BCG-vaccinated CC042 mice  
115 treated with anti-CD4 + anti-CD8 $\alpha$  mAbs and antibiotics (T-depletion + INH/Rif). Each dot  
116 represents an individual mouse, n=4-5 mice per group. One-way ANOVA with Šídák's multiple  
117 comparisons test. Box plots indicate median (middle line), 25th, 75th percentile (box) and  
118 minimum and maximum (whiskers).

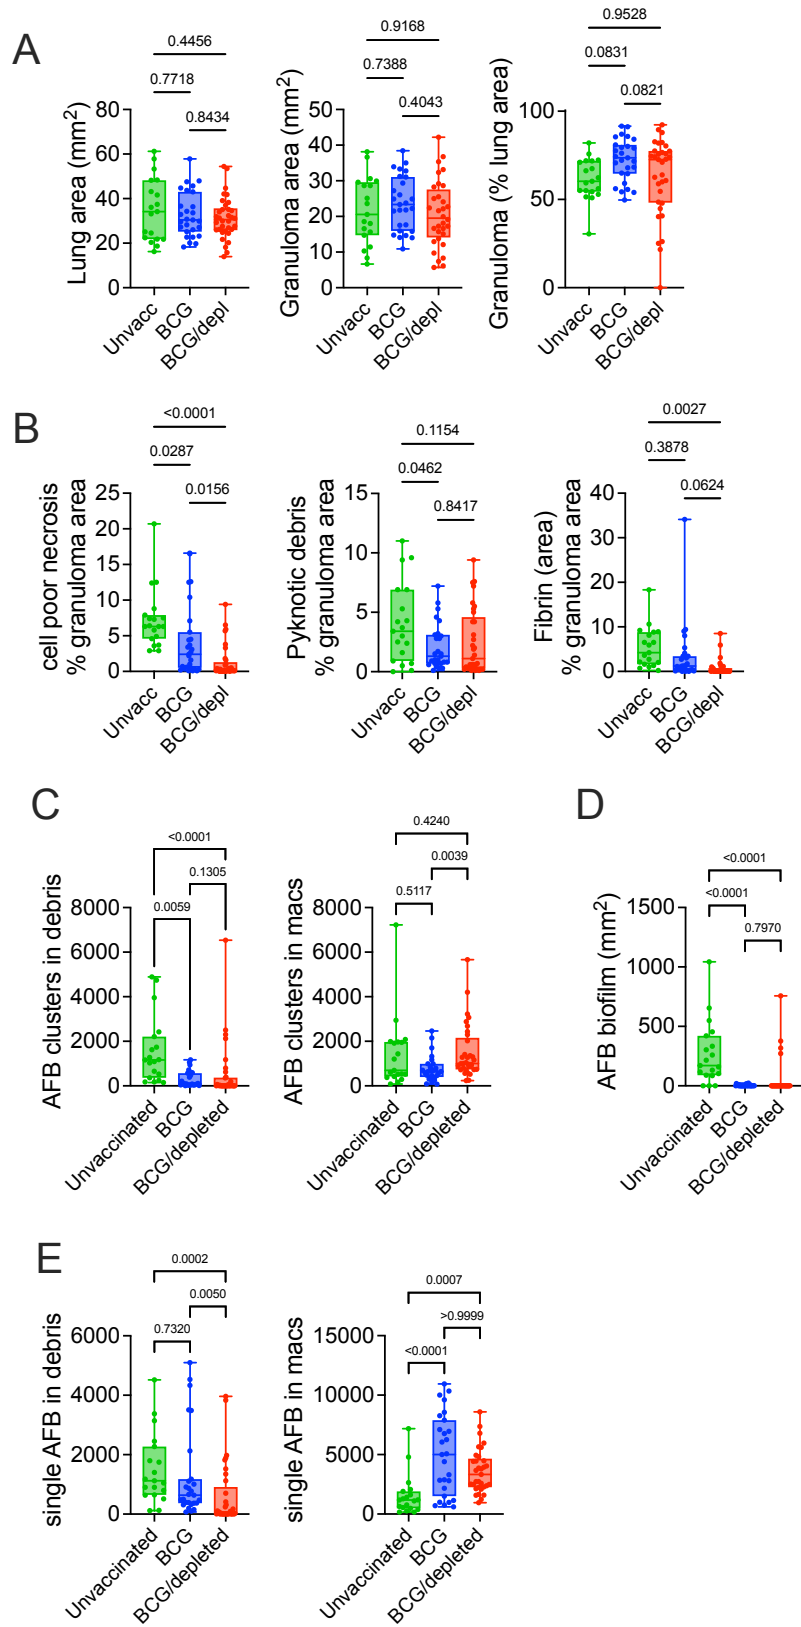

119

120

121 **Figure S9. Histological analysis (pertains to Fig.8)**

122 A-D. Automated image analysis of histopathological tissue. Three to five lung lobes were analyzed  
123 per mouse for a total of 19 (unvaccinated), 27 (BCG), and 34 (BCG+T depletion). **A.** The total  
124 area of each scanned lung (left), the total area occupied by lesional tissue (i.e., granulomas,  
125 center), and the percentage of the lung occupied by granulomas (right). **B.** Analysis of parameters  
126 related to tissue death and destruction including the percentage of lung occupied by cell poor  
127 necrosis (left), the percentage of pyknotic debris (middle), and the amount of fibrin (right). **C.**  
128 Measurement of parameters relating to the bacterial burden including, from left to right, the  
129 number of AFB clusters in debris or in macrophages. the number of single Mtb in debris or  
130 macrophages. **D.** The absolute area of AFB biofilm. **E.** The number of single Mtb in debris (left)  
131 or macrophages (right).

132 A-E. Comparisons between different groups were analyzed using a non-parametric one-way  
133 Anova (Kruskal-Wallis). Box plots indicate median (middle line), 25th, 75th percentile (box) and  
134 minimum and maximum (whiskers).

135
